# Supplementary material for: Synthesis of 4-thiol-furanosidic uronate via hydrothiolation reaction
Source: Royal Society of Chemistry journal article supplement (doi:10.1039/d1ra02110a), 2021-01-01

## Supporting Information

### Synthesis of 4-thiol-furanosidic uronate *via* hydrothiolation reaction

Shih-Ting Ma, Chia-Wei Lee and Wei-Min Liu\*

Department of Chemistry, Fu Jen Catholic University, 510 Zhongzheng Road, Xinzhuang District,  
New Taipei City 24205, Taiwan

(A)

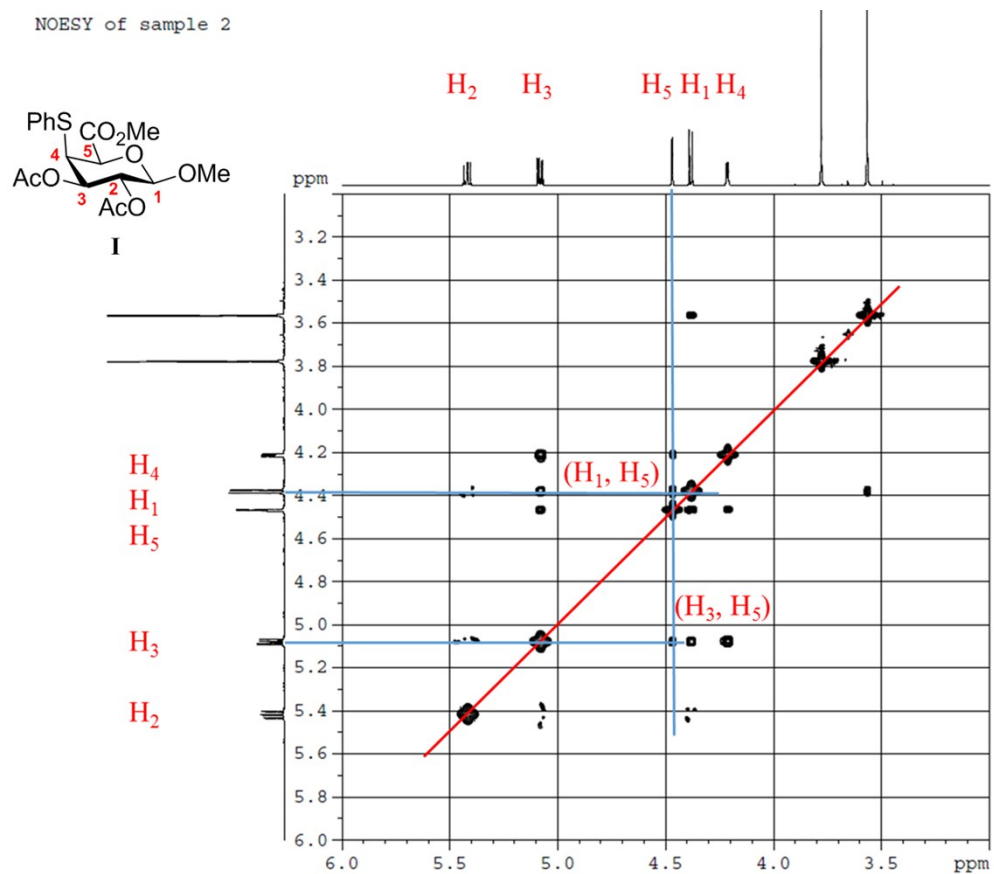

(B)

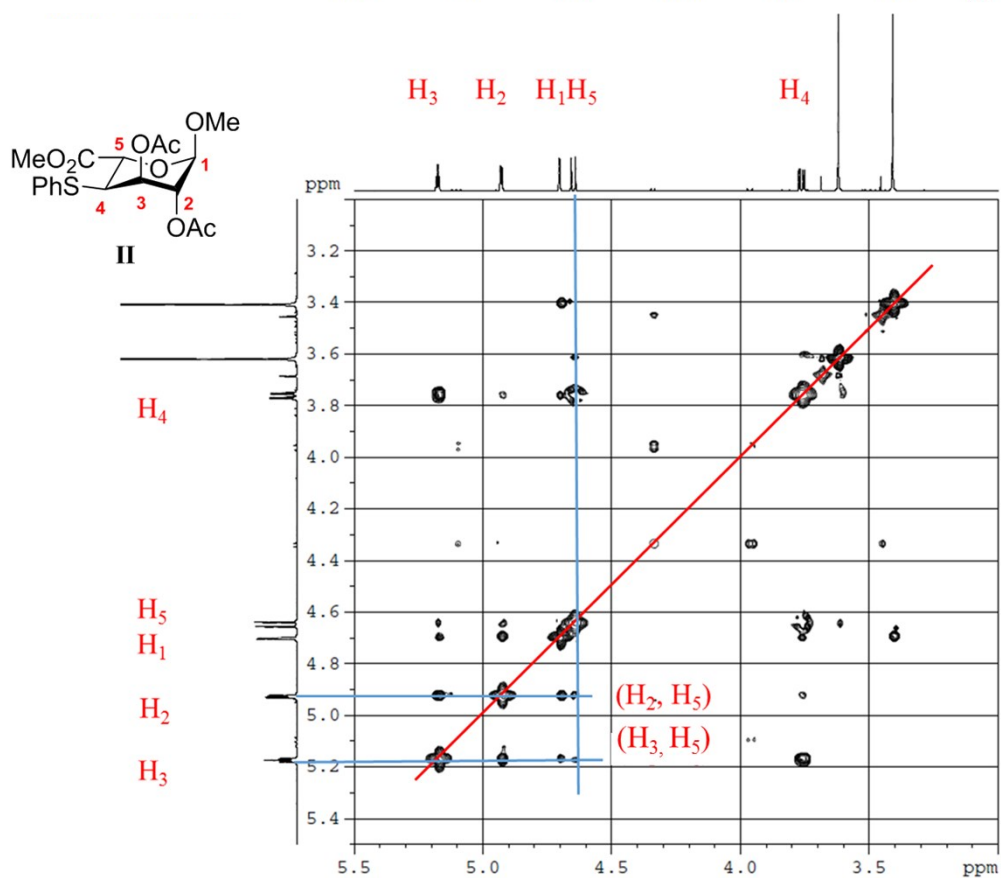

**Figure S1.** The NOESY spectra of compound **I** (A) and **II** (B).

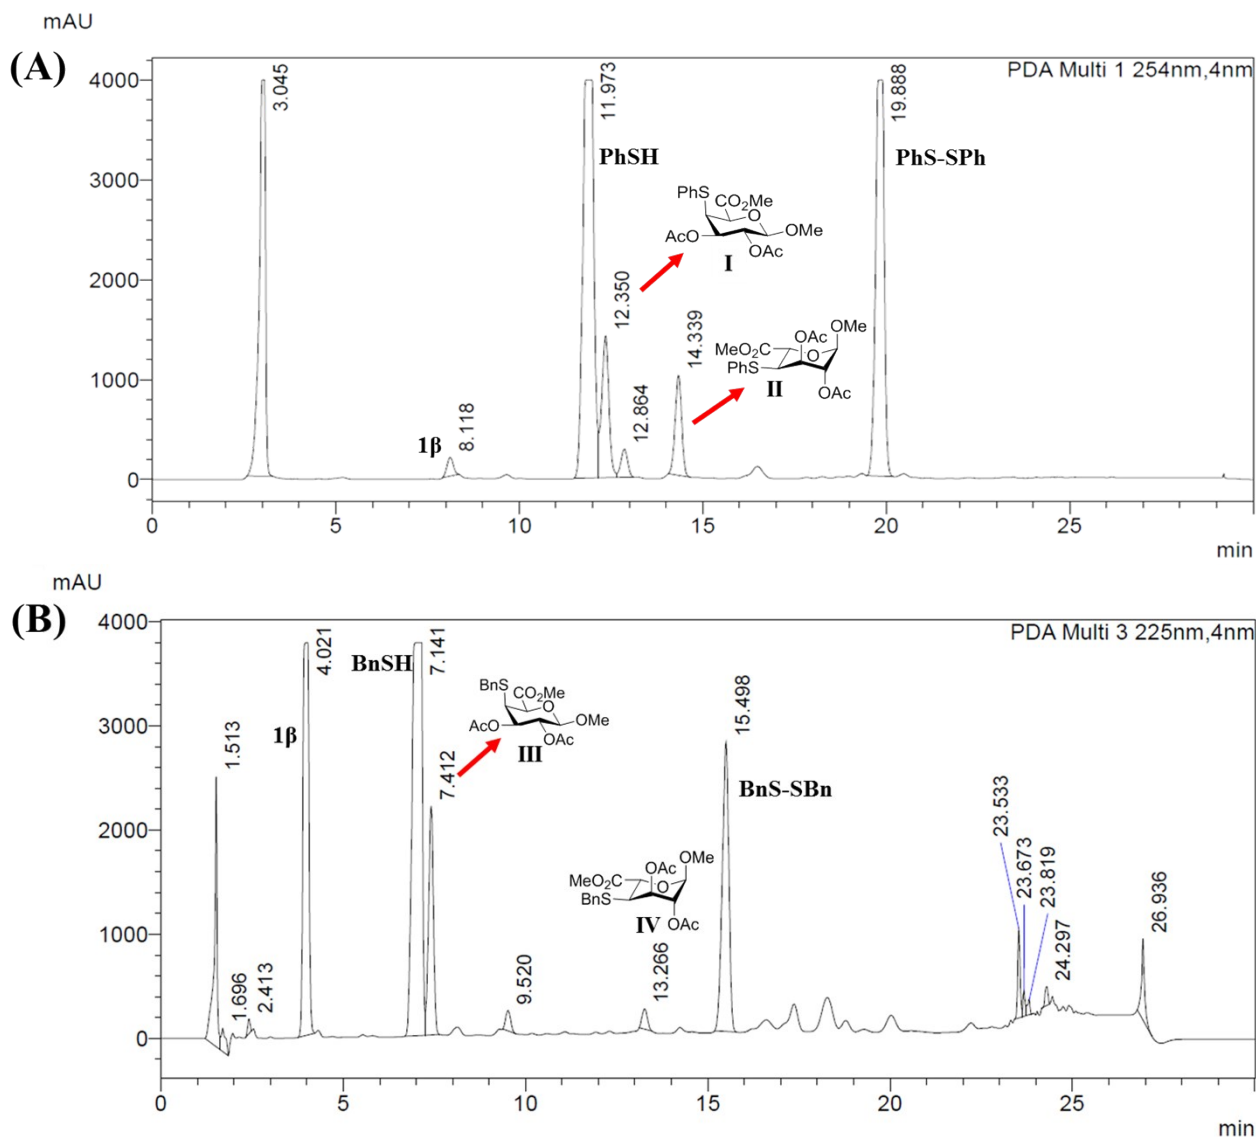

**Figure S2.** The ratio of desired products was determined by HPLC analysis. Using PhS (A) and BnSH (B), respectively, as nucleophiles for base-mediate thiol-Michael addition, the reaction crude mixture was diluted with acetonitrile and that was immediately analyzed by HPLC.

**Table S1.** **1β** with metallic salts and alcohols containing bulky alkyl group.

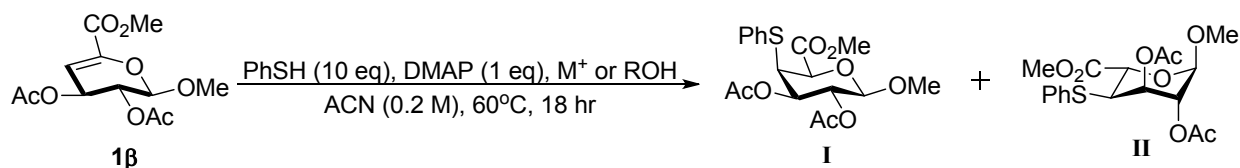

| Entry | Additives (equiv.)                           | Yield <sup>[a]</sup> | I:II <sup>[a]</sup> |
|-------|----------------------------------------------|----------------------|---------------------|
| 1     | none                                         | 72 %                 | 1.6:1               |
| 2     | MgBr <sub>2</sub> .OEt <sub>2</sub> (0.1 eq) | 73 %                 | 1.1:1               |
| 3     | Mg(ClO <sub>4</sub> ) <sub>2</sub> (0.1 eq)  | 78 %                 | 1.1:1               |
| 4     | Mg(OTf) <sub>2</sub> (0.1 eq)                | 76 %                 | 1.1:1               |
| 5     | NaBr (0.1 eq)                                | 73 %                 | 1.2:1               |
| 6     | ZnCl <sub>2</sub> (0.1 eq)                   | 65 %                 | 1.3:1               |
| 7     | IPA (1 eq)                                   | 75 %                 | 1.3:1               |
| 8     | t-BuOH (1 eq)                                | 76 %                 | 1.3:1               |

[a] yield percentage and the ratio of products were determined by high performance liquid chromatography (HPLC) analysis.

**Table S2.** Retro thiol-Michael addition.

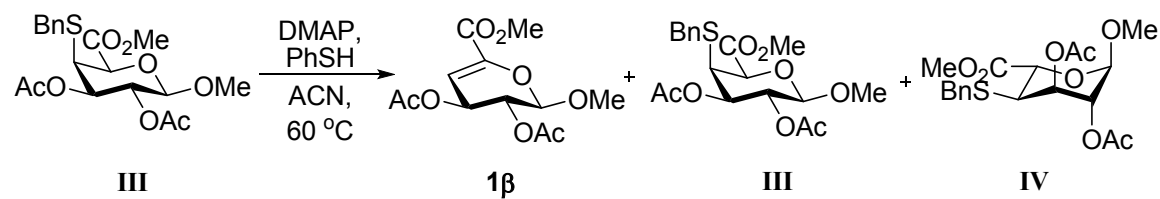

| Entry | Thiol (Eq.) | Time  | Result <sup>[a]</sup>                           |
|-------|-------------|-------|-------------------------------------------------|
| 1     | -           | 1 hr  | <b>III</b> (100)                                |
| 2     | -           | 3 hr  | <b>III</b> (100)                                |
| 3     | -           | 12 hr | <b>1β</b> + <b>III</b> + <b>IV</b> (1 : 97 : 2) |
| 4     | BnSH (10)   | 1 hr  | <b>III</b> (100)                                |
| 5     | BnSH (10)   | 3 hr  | <b>1β</b> + <b>III</b> (1: 99)                  |
| 6     | BnSH (10)   | 12 hr | <b>1β</b> + <b>III</b> + <b>IV</b> (2 : 96 : 2) |

[a] The ratio of products was determined by HPLC analysis.

### Synthesis of compound 1 $\beta$ :

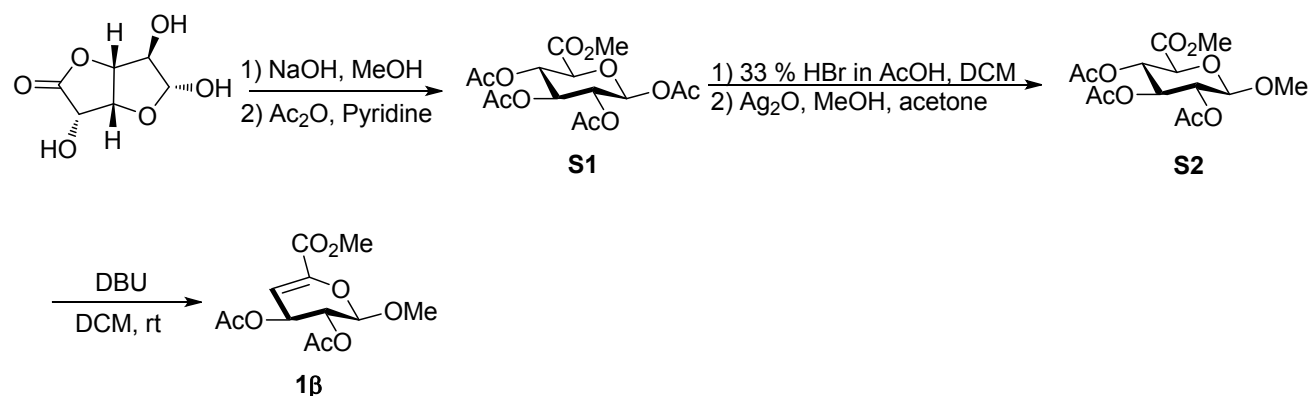

**Scheme S1.** Synthesis of methyl (methyl 2,3-di-O-acetyl-4-deoxy- $\alpha$ -L-threo-hex-4-enopyranosid)uronate (**1 $\beta$** ).

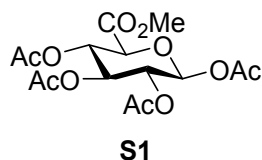

### $\beta$ -D-Glucopyranuronic acid, methyl ester, 1,2,3,4-tetraacetate (**S1**)

To a solution of D-Glucurono-6,3-lactone (10.0 g, 56.8 mmol) in MeOH (30.0 mL) was added NaOH/MeOH (0.01 wt%, 90.0 mL) at 0 °C for 20 min, then the reaction mixture was allowed to warm up to room temperature. After another 16 hr stirring at room temperature, the solvent of this reaction mixture was removed under vacuums and acetic anhydride (47.2 mL) and pyridine (113.6 mL) was added to this crude residue at 0 °C. The reaction was stirred at 0 °C for overnight, then quenched in ice/water. Thereafter, the reaction mixture was diluted with EtOAc and the organic layer was washed with 1 N HCl<sub>(aq)</sub>, and brine to remove pyridine. The organic layer was dried over MgSO<sub>4</sub>, and the organic layer was concentrated under reduced pressure. The crude product was recrystallized from methanol to give a slightly pale yellow powder (45.0 g, 0.1 mol, 52%).  $R_f$  = 0.33 (EtOAc : *n*-Hex = 1 : 3 v/v). <sup>1</sup>H NMR (300 MHz, CDCl<sub>3</sub>, 298 K):  $\delta$  = 5.76 (d,  $J$  = 7.8 Hz, 1H), 5.30 (dd,  $J_1$  =  $J_2$  = 9.2 Hz, 1H), 5.23 (dd,  $J_1$  =  $J_2$  = 9.3 Hz, 1H), 5.13 (dd,  $J_1$  =  $J_2$  = 8.3 Hz, 1H), 4.17 (d,  $J$  = 9.3 Hz, 1H), 3.74 (s, 3H), 2.11 (s, 3H), 2.03 (s, 6H), 2.02 (s, 3H) ppm. <sup>13</sup>C NMR (75 MHz, CDCl<sub>3</sub>, 298 K):  $\delta$  = 170.03,

169.54, 169.31, 168.96, 166.93, 91.48, 73.11, 71.94, 70.27, 69.04, 53.15, 20.89, 20.68, 20.66, 20.59 ppm.  $^1\text{H}$  and  $^{13}\text{C}$  NMR spectra were agreed with reported literature<sup>S1</sup>.

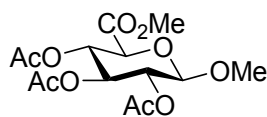

**S2**

### **$\beta$ -D-Glucopyranosiduronic acid, methyl, methyl ester, 2,3,4-triacetate (S2)**

To a solution of **S1** (2.0 g, 5.3 mmol) in dry dichloromethane (24.4 mL) was added 33% HBr in acetic acid (12.4 mL). The reaction was stirred at 0 °C for 20 min then left at 4 °C until the starting material was finished. After which, the reaction was quenched in cool sat.  $\text{NaHCO}_3$  and the aqueous layer was extracted with dichloromethane. The combined organic layer was quickly washed with cold water, cold sat.  $\text{NaHCO}_3$  and brine. After drying over  $\text{MgSO}_4$ , the organic layer was concentrated *via* reduce pressure and the concentrated residue was directly used for next step without purification. To a solution of crude product in dry acetone (43.7 mL) was added  $\text{Ag}_2\text{O}$  (3.7 g, 16.0 mmol) and dry MeOH (19.6 mL, 483.3 mmole) under nitrogen. The reaction mixture was vigorously stirred at room temperature in the dark. After an overnight stirring, the reaction mixture was filtered through a plug of celite and the filtrate was concentrated under reduced pressure. The concentrated residue was diluted with EtOAc, and then it was washed with sat.  $\text{NaHCO}_3$ , water and brine, sequentially. Thereafter, the organic layer was dried over  $\text{MgSO}_4$ , concentrated *via* reduce pressure, and purified by flash column chromatography to yield desired product (1.4 g, 4.0 mmol, 76 %).  $R_f$  = 0.20 (EtOAc : *n*-Hex = 1 : 1.5 v/v).  $^1\text{H}$  NMR (300 MHz,  $\text{CDCl}_3$ ):  $\delta$  = 5.29-5.19 (m, 2H), 5.00 (td,  $J_1$  = 8.2 Hz,  $J_2$  = 3.1 Hz, 1H), 4.48 (d,  $J$  = 7.7 Hz, 1H), 4.04 (dd,  $J_1$  = 6.6 Hz,  $J_2$  = 3.0 Hz, 1H), 3.77 (s, 3H), 3.52 (s, 3H), 2.05 (s, 3H), 2.03 (s, 3H), 2.02 (s, 3H) ppm.  $^{13}\text{C}$  NMR (75 MHz,  $\text{CDCl}_3$ , 298 K):  $\delta$  = 170.28, 169.53, 169.47, 167.41, 101.82, 72.77, 72.23, 71.29, 69.61, 57.46, 53.05, 20.82, 20.75, 20.65 ppm.  $^1\text{H}$  and  $^{13}\text{C}$  NMR spectra were agreed with reported literature<sup>S1</sup>.

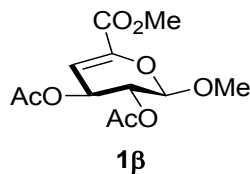

**methyl (methyl 2,3-di-O-acetyl-4-deoxy- $\alpha$ -L-threo-hex-4-enopyranosid)uronate (1 $\beta$ )**

To a solution of compound **S3** (30.0 mg, 0.1 mmol) in dry dichloromethane (0.8 mL) was slowly added DBU (66.0  $\mu$ L, 0.7 mmol) under Ar<sub>(g)</sub>. After 4 hr stirring at room temperature, the reaction was quenched by sat. NH<sub>4</sub>Cl<sub>(aq)</sub> and diluted with dichloromethane. The organic layer was washed with water and brine, sequentially. Thereafter, the organic layer was dried over MgSO<sub>4</sub>, concentrated under reduced pressure, then purification by flash column chromatography giving a white powder (21.6 mg, 0.07 mmol, 89 %).  $R_f$  = 0.30 (EtOAc : *n*-Hex = 1 : 2 v/v). <sup>1</sup>H NMR (300 MHz, CDCl<sub>3</sub>):  $\delta$  = 6.22 (dd,  $J_1$  = 4.5 Hz,  $J_2$  = 1.2 Hz, 1H), 5.19 (ddd,  $J_1$  = 0.7 Hz,  $J_2$  = 2.0 Hz,  $J_3$  = 4.5 Hz, 1H), 5.13 (dd,  $J_1$  = 2.8 Hz,  $J_2$  = 0.6 Hz, 1H), 5.09-5.07 (m, 1H), 3.84 (s, 3H), 3.52 (s, 3H), 2.10 (s, 3H), 2.09 (s, 3H) ppm. <sup>13</sup>C NMR (75 MHz, CDCl<sub>3</sub>, 298 K):  $\delta$  = 170.08, 169.50, 142.31, 107.34, 97.74, 68.74, 64.34, 57.06, 52.68, 20.99, 20.81 ppm. <sup>1</sup>H and <sup>13</sup>C spectra were agreed with reported literature<sup>S1</sup>.

**References:**

- S1. Jongkees, S. A. K.; Withers, S. G., Glycoside Cleavage by a New Mechanism in Unsaturated Glucuronyl Hydrolases. *J. Am. Chem. Soc.* **2011**, *133*, 19334-19337.

## **Appendix $^1\text{H}$ and $^{13}\text{C}$ NMR spectra**

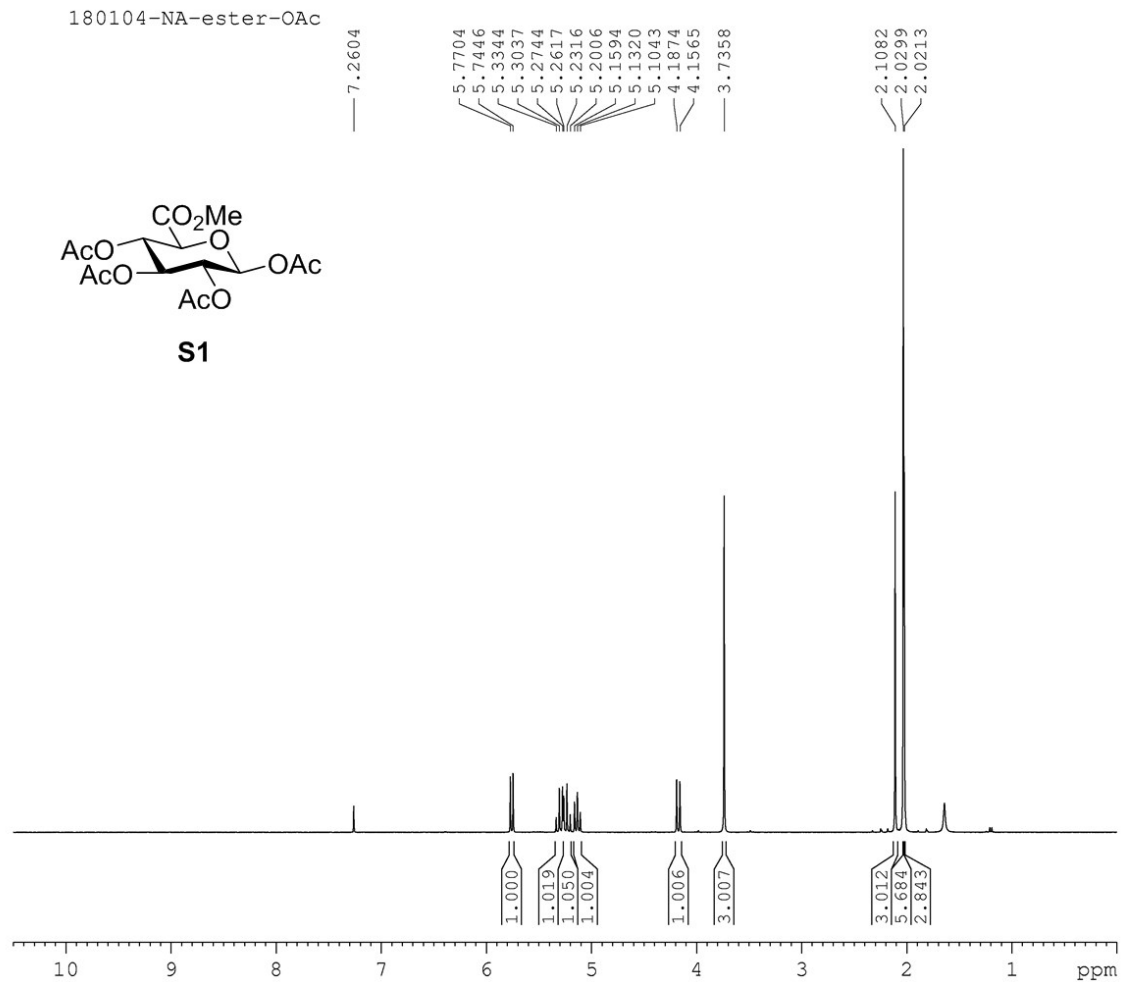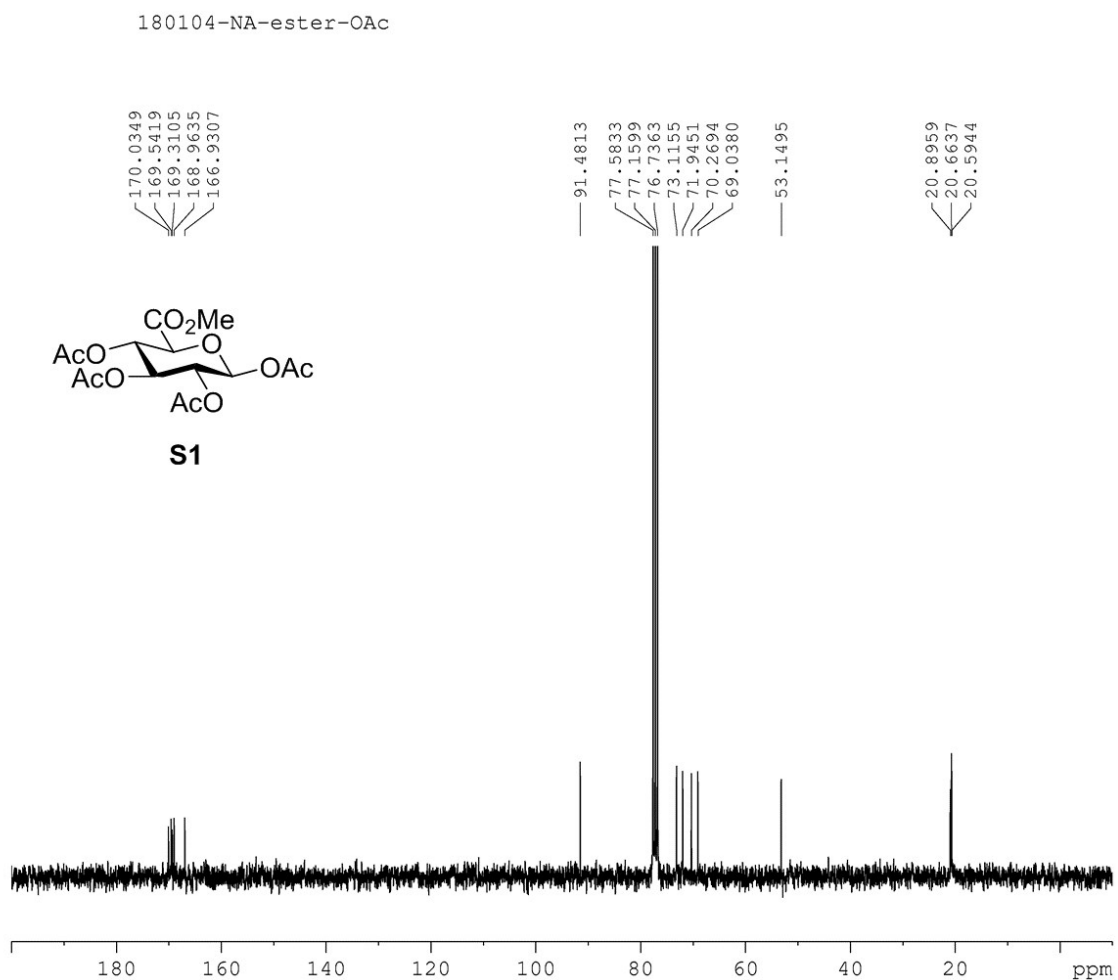

171207-NA-ester-OMe cry

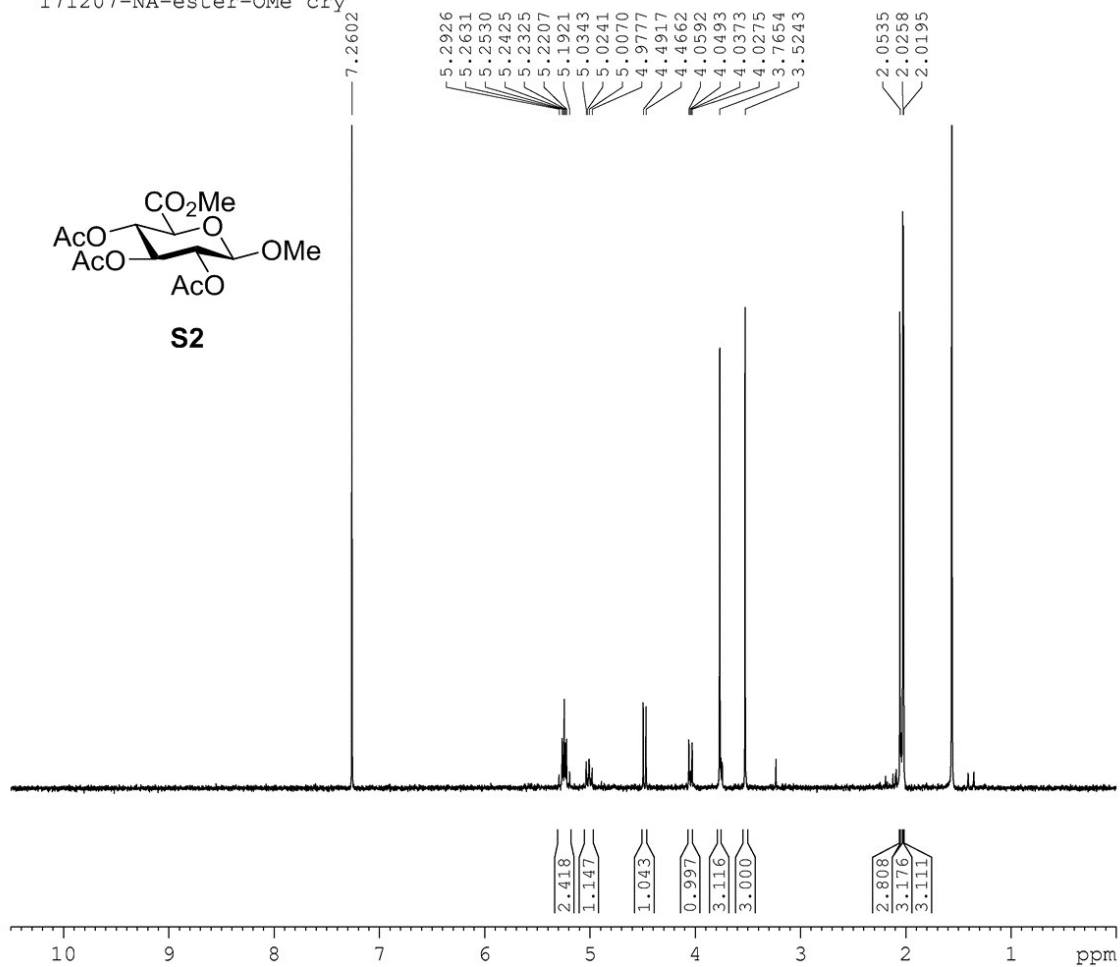

191006-NA-ester-OMe 13C

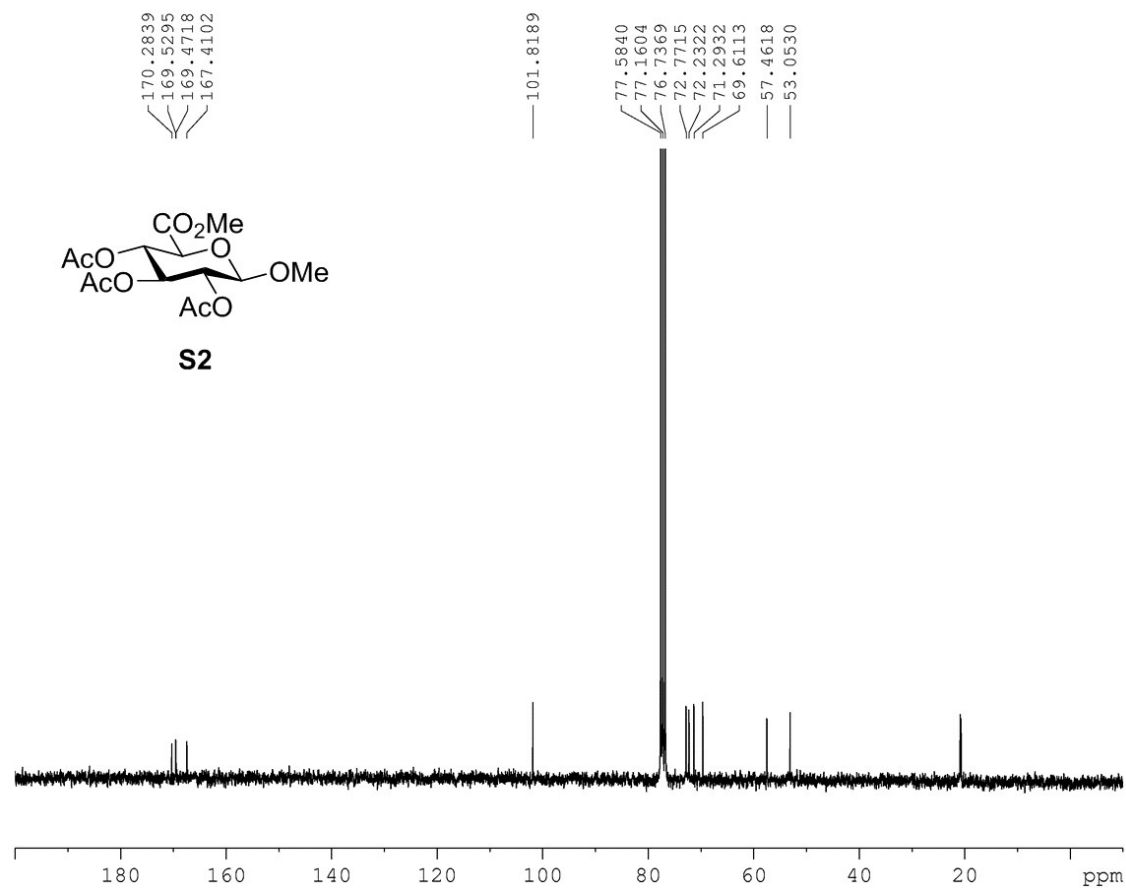

171208-NA-ester

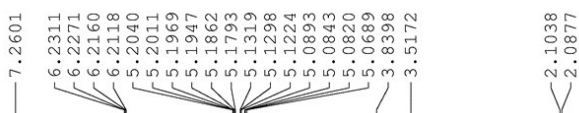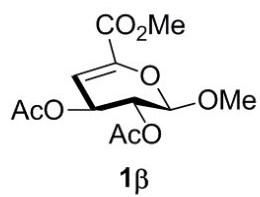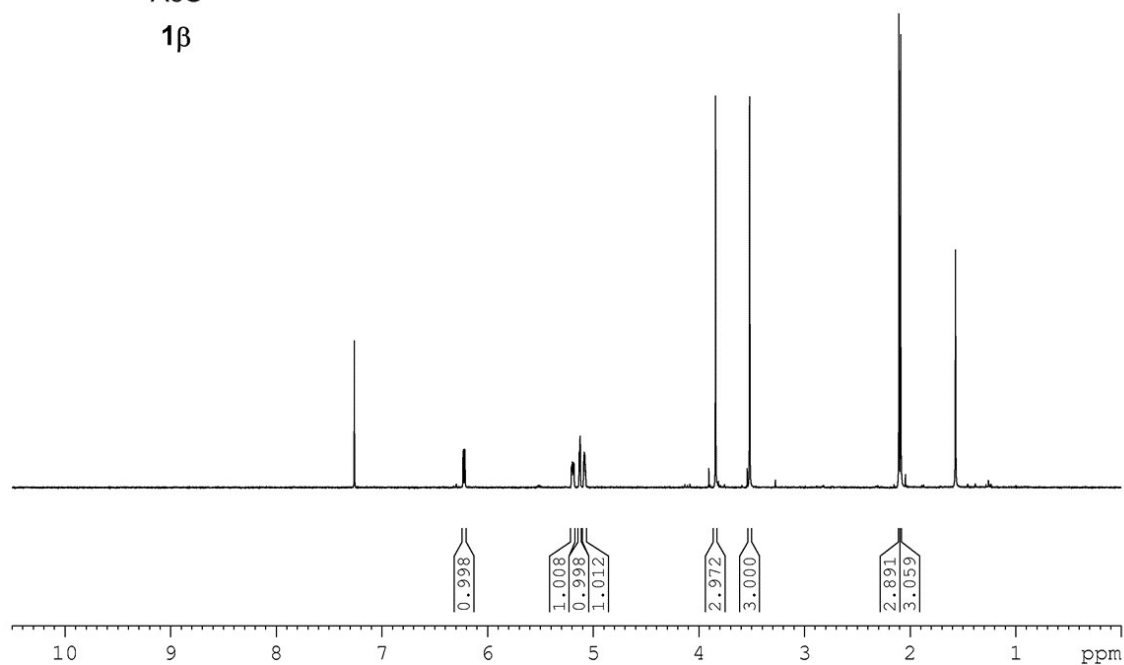

191010-NA-ester

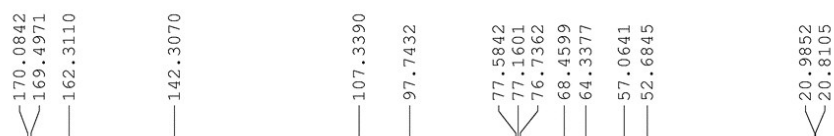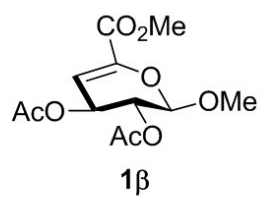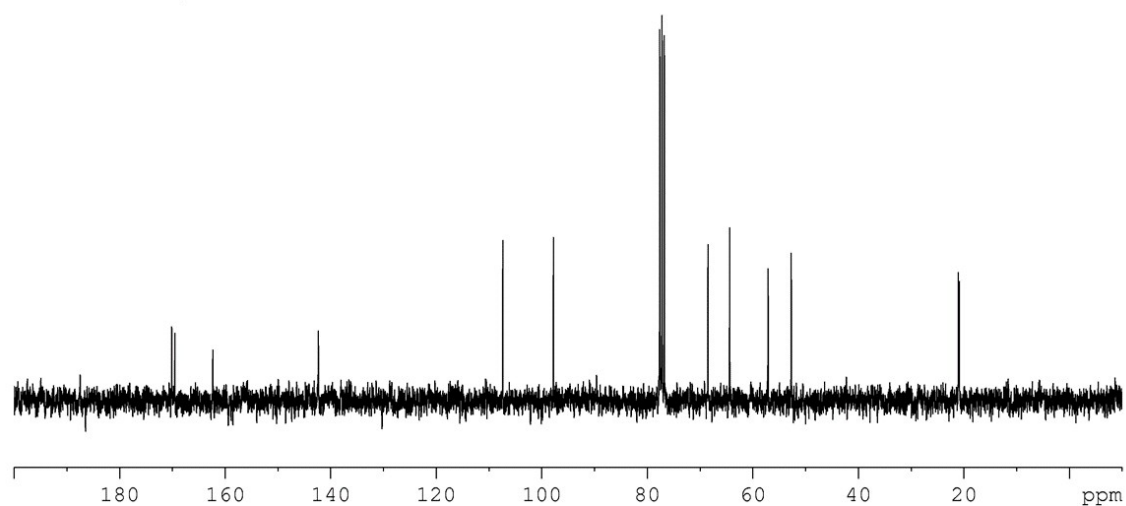

170812-NA-test013-col-2

7.47450  
7.45130  
7.31611  
7.30966  
7.2837  
7.2626  
7.2345

5.4675  
5.4405  
5.4338  
5.4073  
5.1198  
5.1052  
5.0863  
5.0713  
4.4936  
4.4876  
4.4129  
4.3865  
4.2435  
4.2370  
4.2288  
4.2227  
3.7962  
3.5838

— 2.0820  
— 1.6257

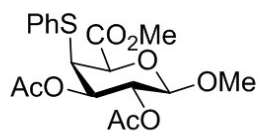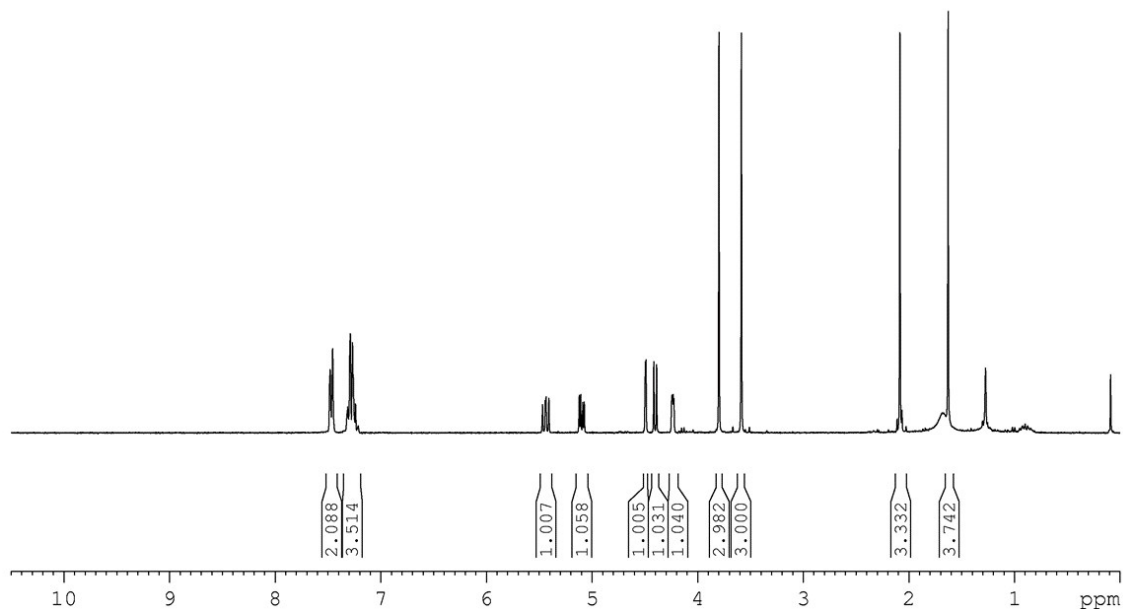

170812-NA-test013-col-2

170.5963  
169.4592  
167.5968

134.7962  
132.4388  
129.1522  
127.6656

— 102.5115

77.5816  
77.1582  
76.7347  
73.8822  
73.2430  
69.1499  
57.1219  
52.7390  
52.5144

20.9438  
20.2411

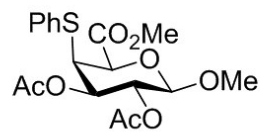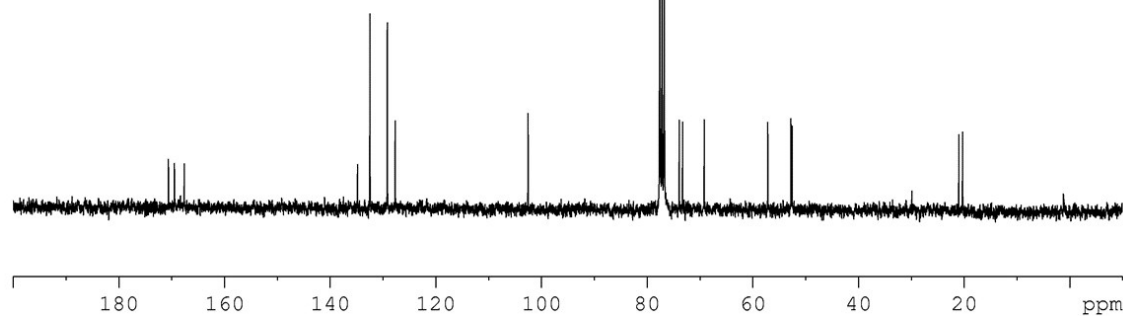

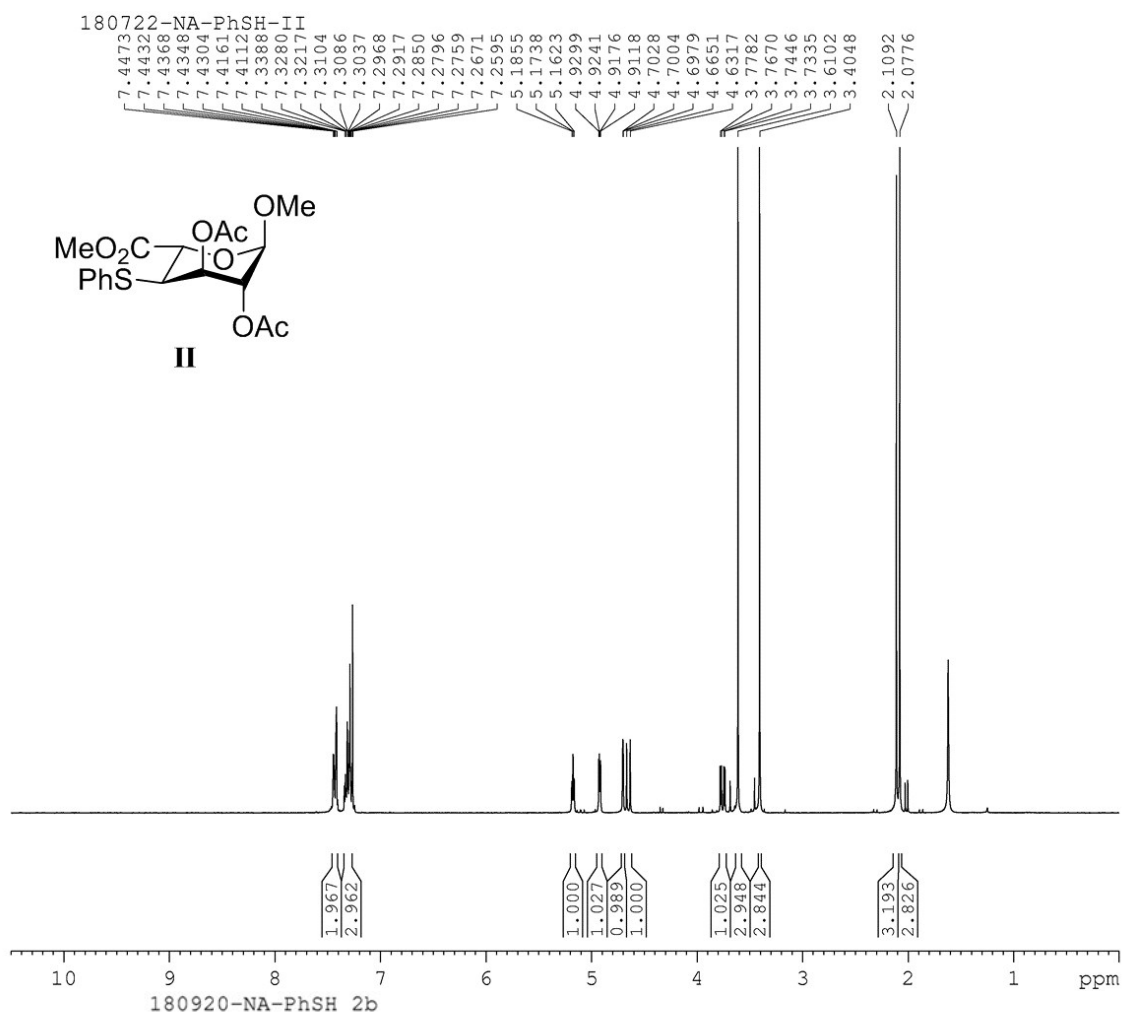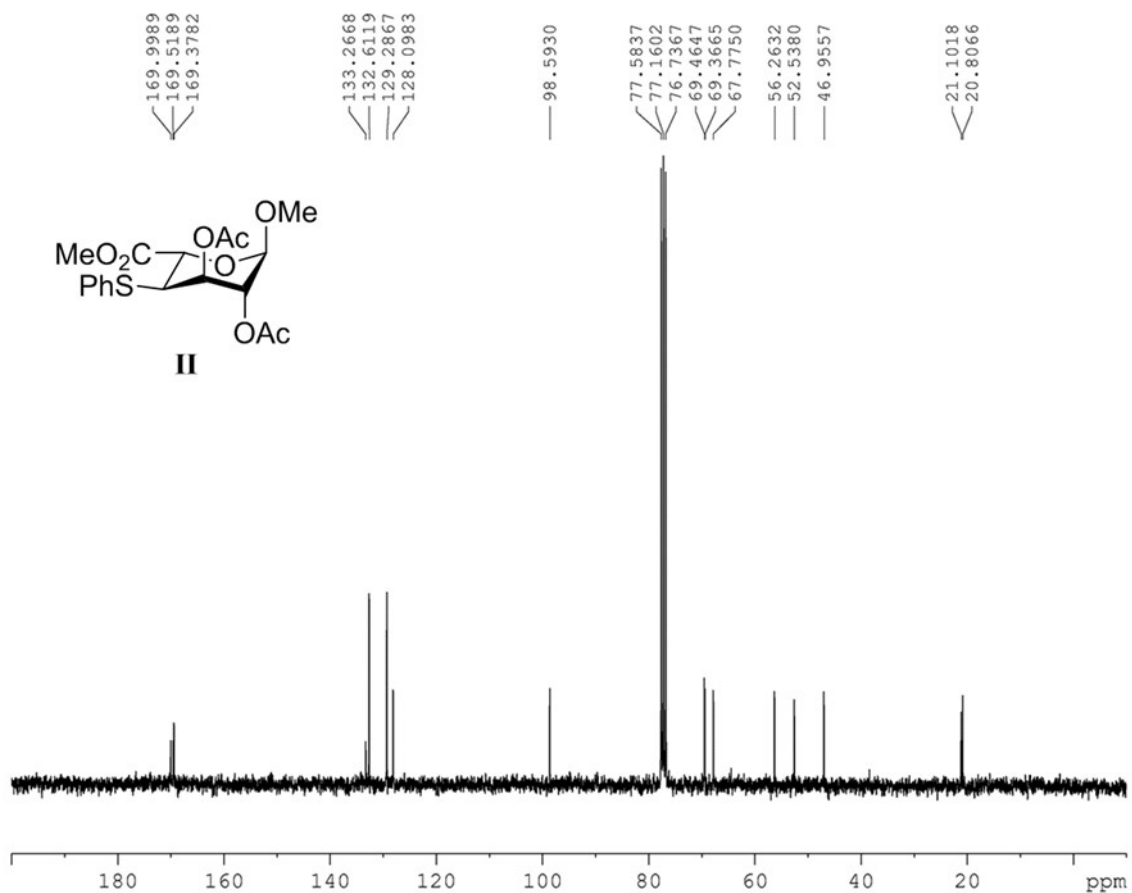

190524-NA-314475-tube24

7.3319  
7.3255  
7.3198  
7.3038  
7.2977  
7.2794  
7.2717  
7.2680  
7.2596  
7.2397  
7.2216  
7.2158  
7.1948  
5.2428  
5.2169  
5.2089  
5.1830  
5.0962  
5.0814  
5.0623  
5.0476  
4.3278  
4.3234  
4.3015  
3.7271  
3.6819  
3.6531  
3.6263  
3.6081  
3.5702  
3.5638  
3.5555  
3.5490  
3.5137  
2.0418  
1.9594

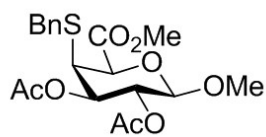

III

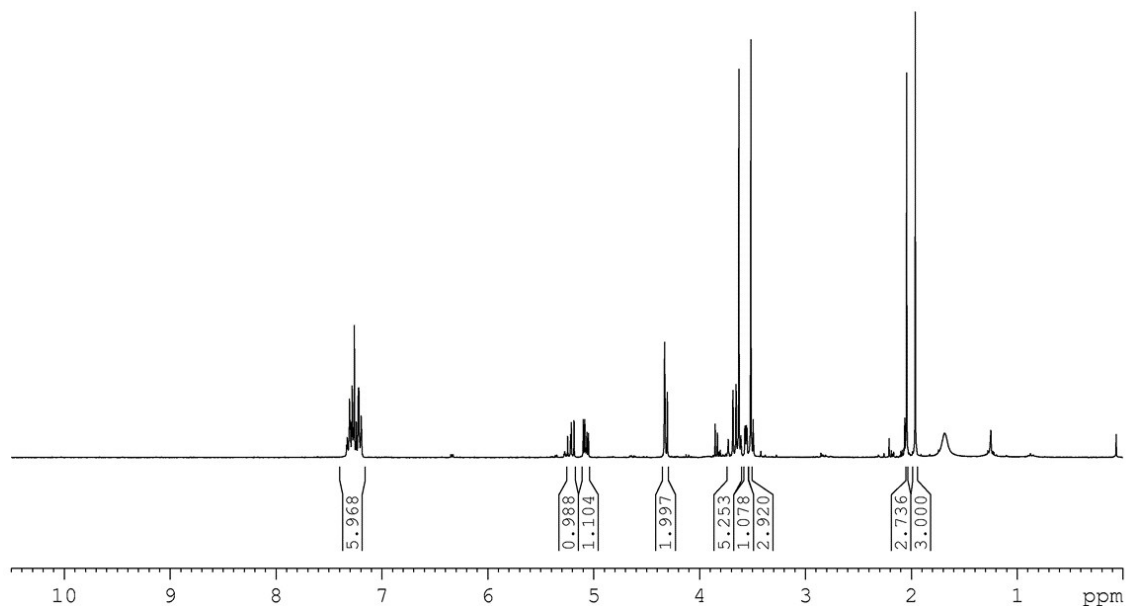

190815-NA-314495-tube22-13C

170.3787  
169.4422  
167.3951  
137.9103  
129.2859  
128.7341  
127.4194  
102.2281  
77.5854  
77.1621  
76.7388  
74.1806  
72.9408  
69.7017  
56.9877  
52.6147  
46.7831  
37.6572  
20.8926

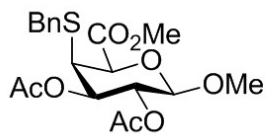

III

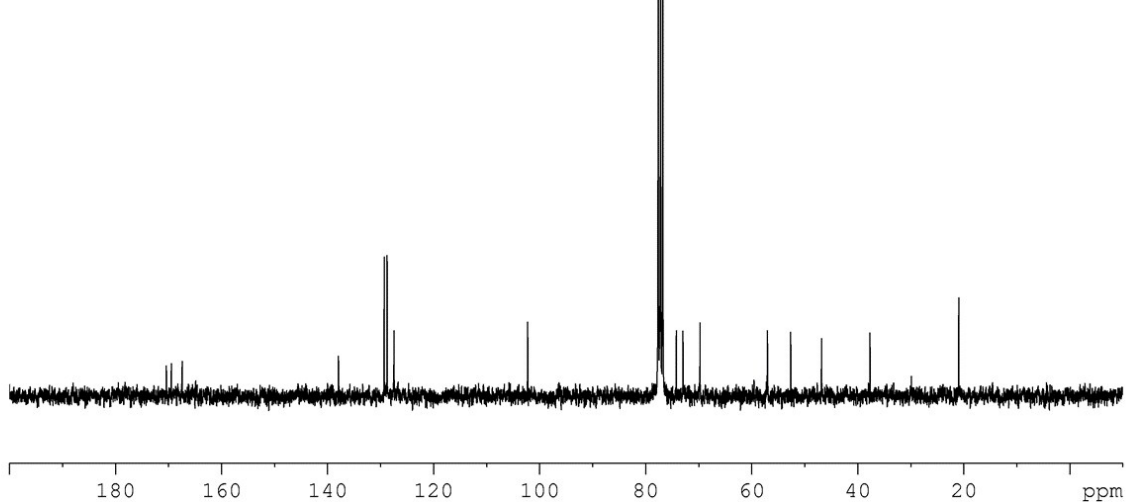

190801-NA-314495-tube9

7.3220  
7.3069  
7.2736  
7.2599  
7.2458

4.7809  
4.7765  
4.7702  
4.7665  
4.7586  
4.7501  
4.6246  
4.6229  
4.5687  
4.5323  
3.8413  
3.7265  
3.7220  
3.2074  
3.1987  
3.1710  
3.1626

2.0869  
2.0159

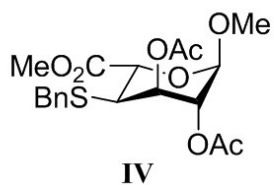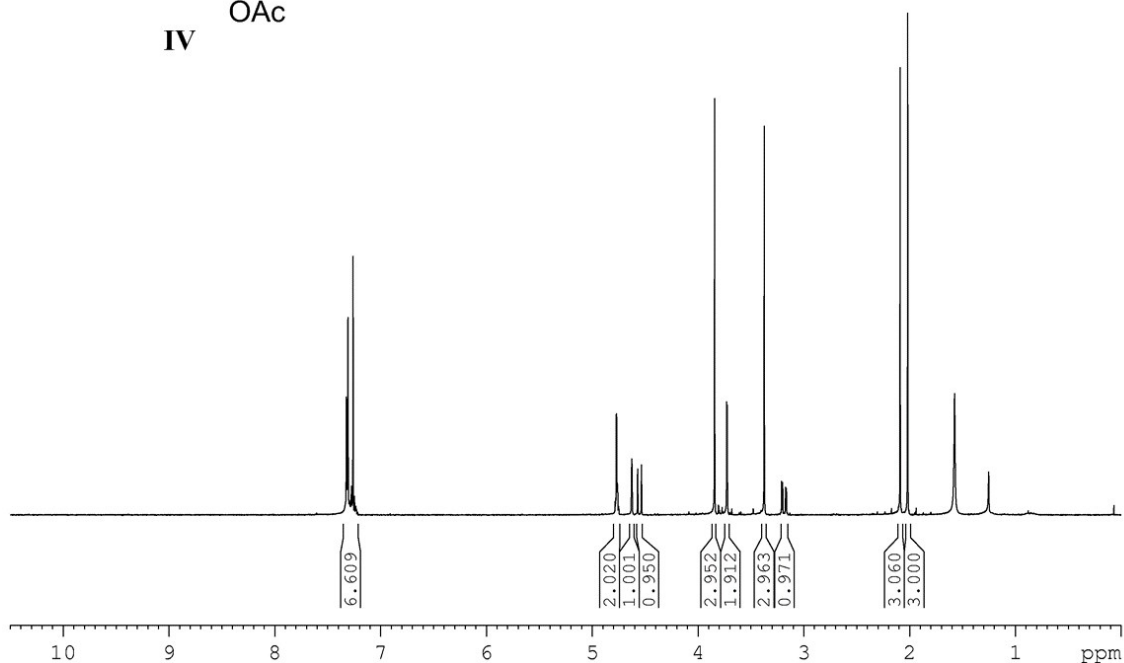

190518-NA-314475-tube 10 13C

169.9920  
169.9253  
169.3300

137.2959  
129.3839  
128.6914  
127.5139

98.4726

77.5833  
77.1598  
76.7362  
69.4685  
68.8508  
67.3262

56.1348  
52.7273

40.9828  
36.5716

20.9728  
20.8890

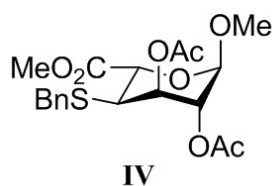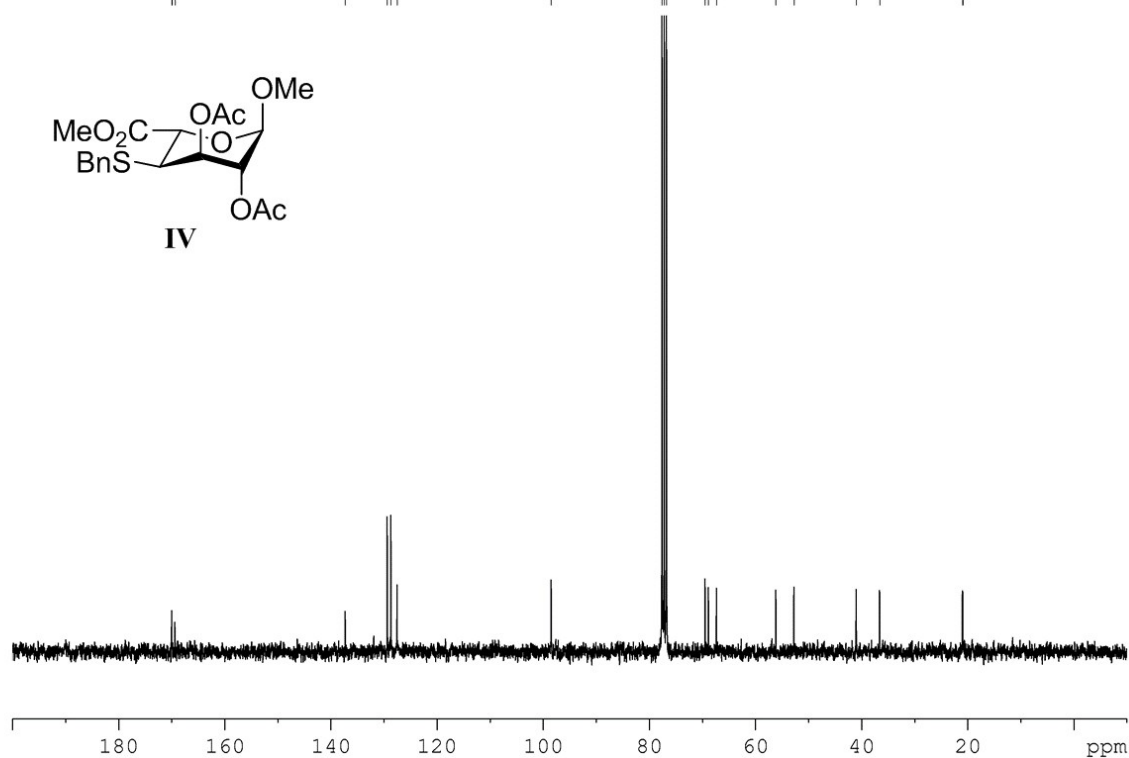

NOESY of 314495-tube 22

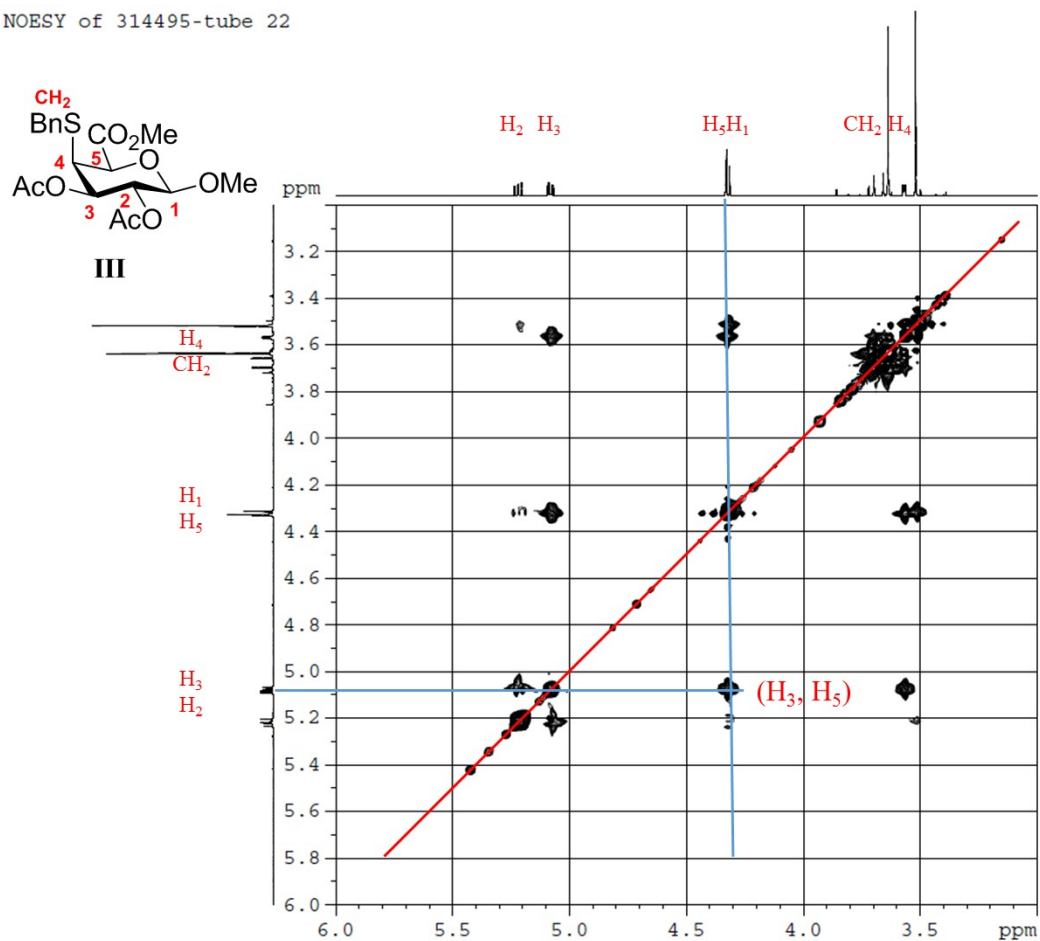

NOESY of 314495-tube 9

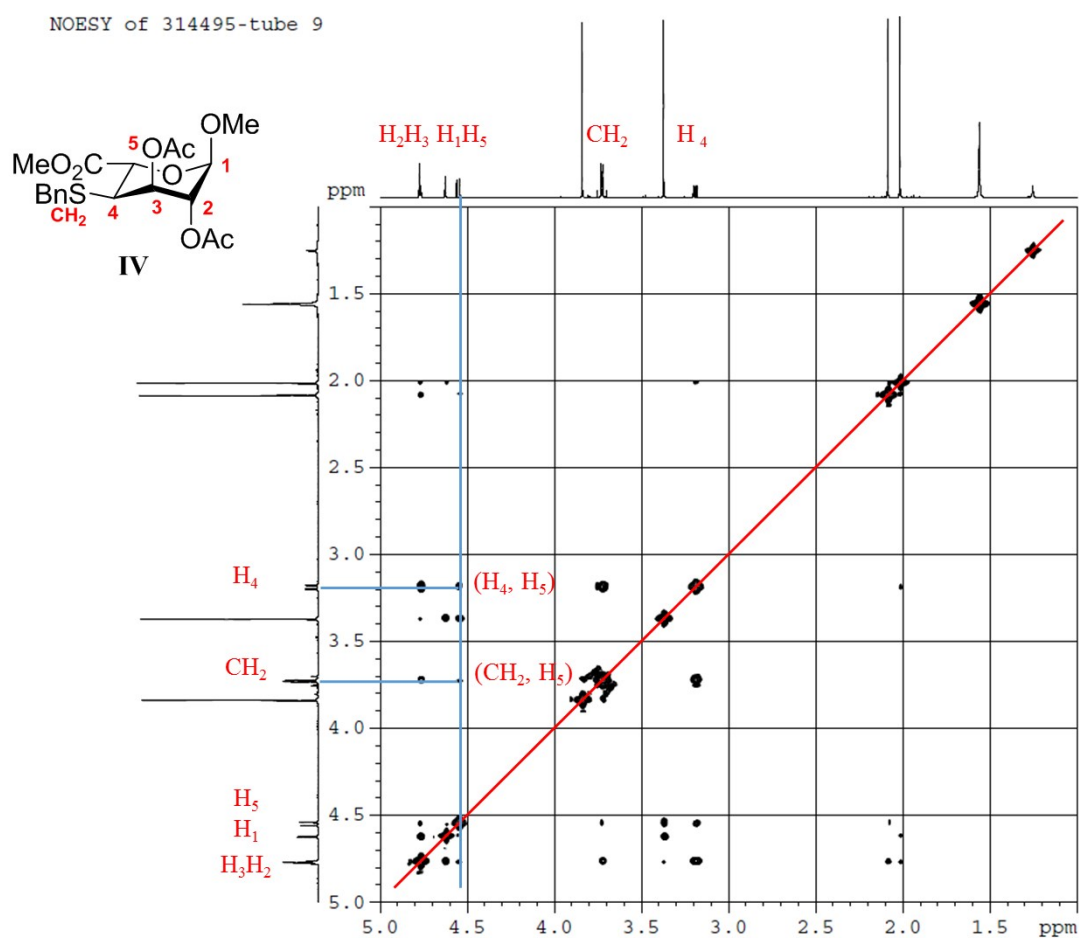

200729-NA-310743-tube 28-35

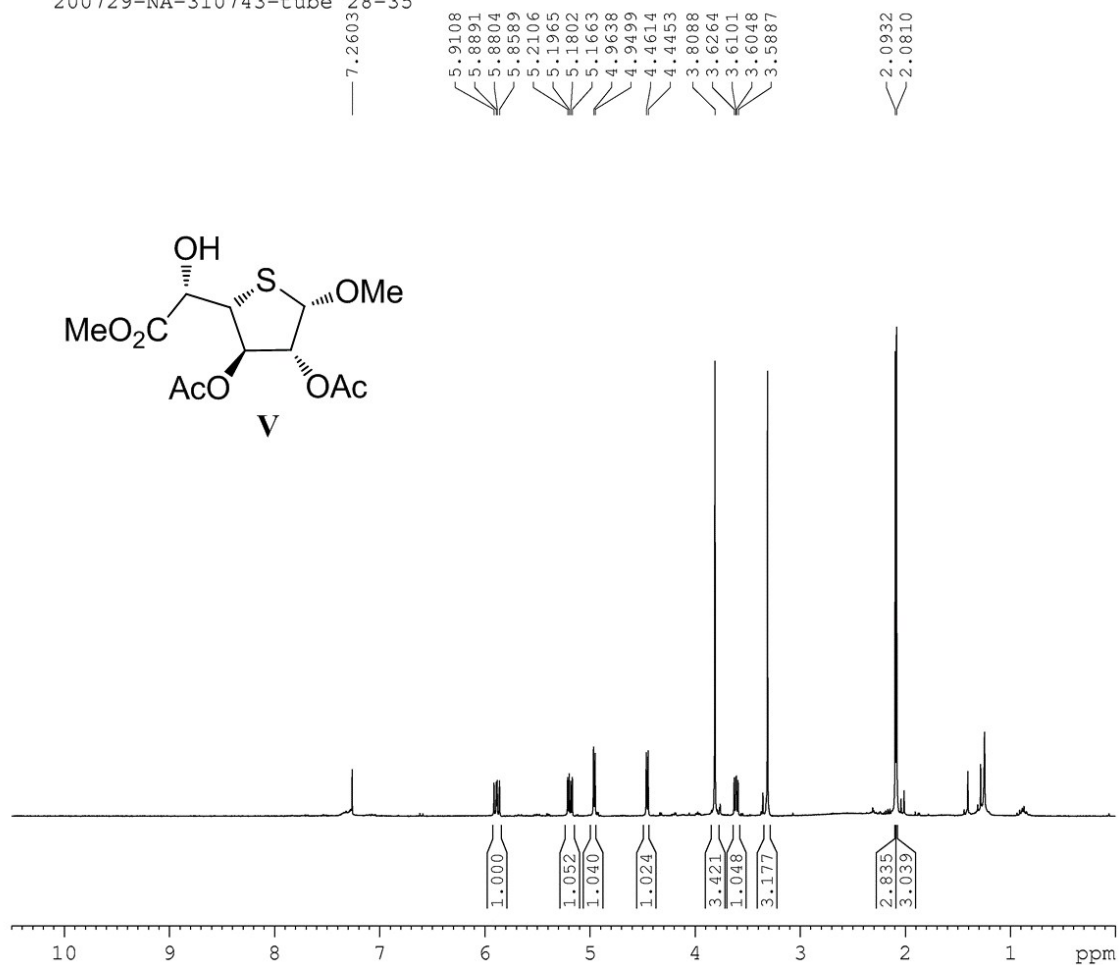

200729-NA-310743-tube 28-35 13C

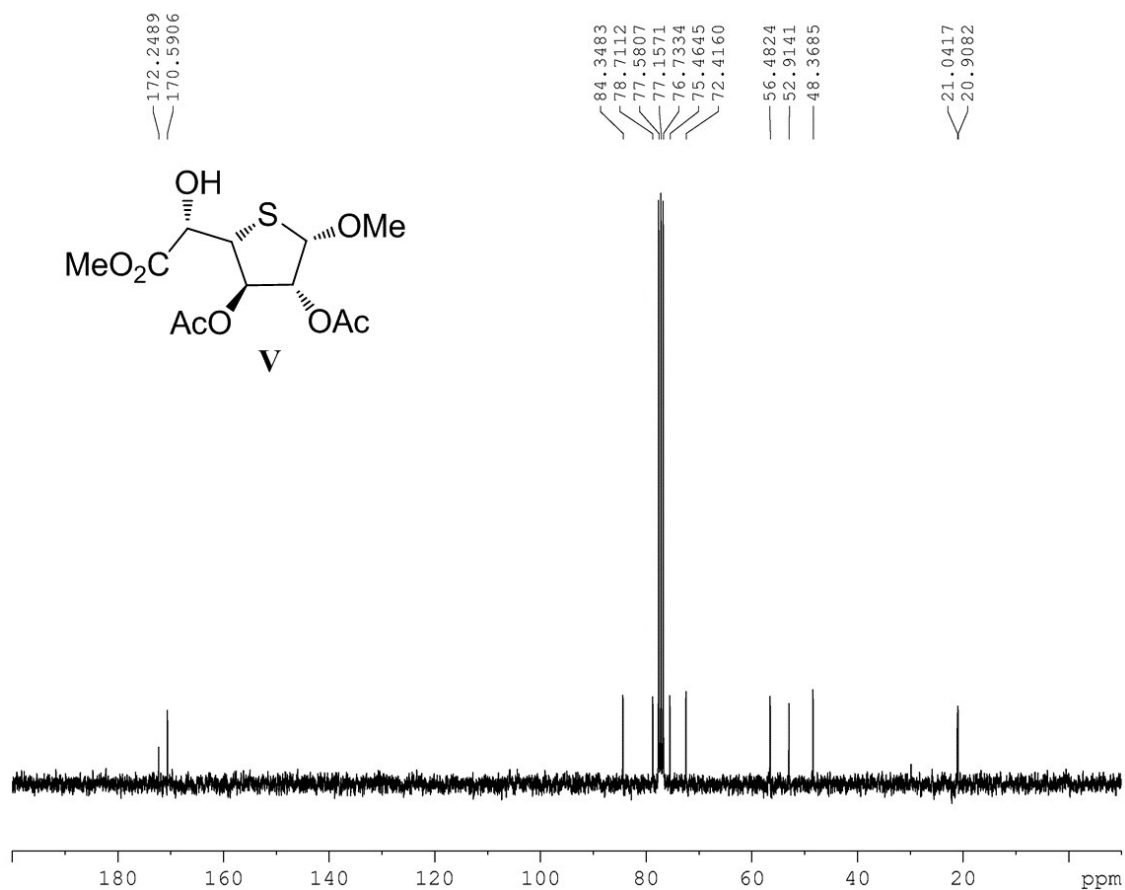

NOESY of 310743

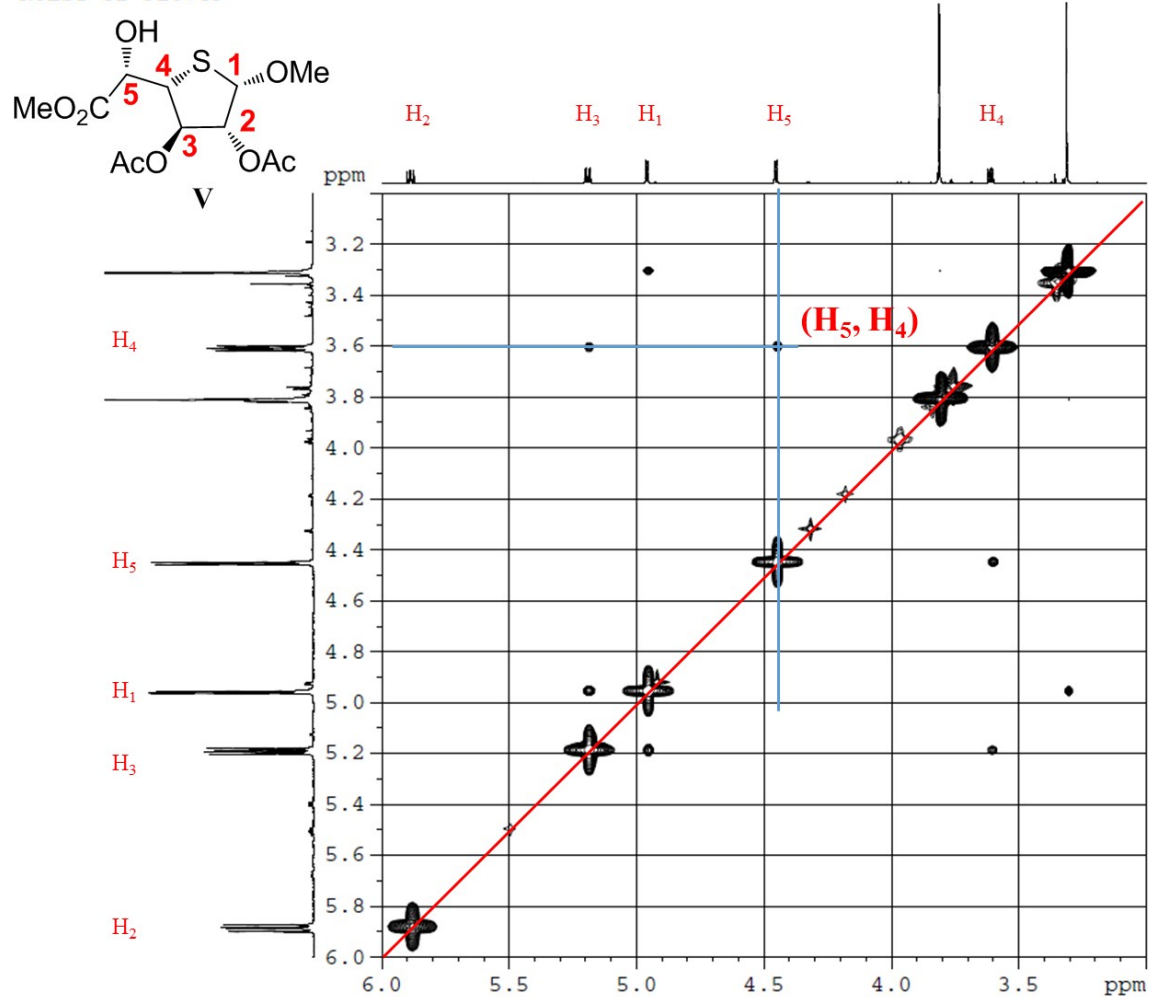

Supplement: d1ra02110a1.pdf [file d1ra02110a1.pdf]
